# Supplementary material
Source: Elsevier journal article supplement (https://www.sciencedirect.com/science/article/pii/S0210569119301718)
Supplement: mmc1 [file S0210569119301718:mmc1.pdf]

## Evaluación 1

Género ☐ 1 Masculino ☐ 2 FEMENINO

Edad  Años

### Estado civil

☐ 1 CON PAREJA HABITUAL ☐ 2 SIN PAREJA HABITUAL ☐ 3 SIN PAREJA

Número hijos

### Años de experiencia laboral

Experiencia en el sector sanitario  
Experiencia en el puesto actual

|                      |
|----------------------|
| <input type="text"/> |
| <input type="text"/> |
| <input type="text"/> |

Años

Años

Años

### Cargo que ocupa

|                            |            |                            |          |
|----------------------------|------------|----------------------------|----------|
| <input type="checkbox"/> 1 | MÉDICO     | <input type="checkbox"/> 2 | AUXILIAR |
| <input type="checkbox"/> 3 | ENFERMERÍA | <input type="checkbox"/> 4 | OTROS    |

### Turno de trabajo

Mañana

Tarde

### UCI en la que trabaja

POLITRAUMA

MÉDICO-QUIRÚRGICA

MICA

Especificar sistema de guardias.....

### ¿Tiene algún tipo de creencias religiosas o no religiosas?

☐ 1 SÍ ☐ 2 NO

### He tenido experiencias traumáticas personales directas en mi vida adulta y/o niñez

☐ 1 SÍ ☐ 2 NO

Especificar dicha experiencia en caso de respuesta afirmativa: .....

Escriba la primera letra del nombre de su madre

Escriba la primera letra del nombre de su padre

Escriba el día en el que nació

Escriba las dos últimas cifras del año en el que nació

|                      |                      |
|----------------------|----------------------|
| <input type="text"/> |                      |
| <input type="text"/> |                      |
| <input type="text"/> | <input type="text"/> |
| <input type="text"/> | <input type="text"/> |

PASE LA PÁGINA POR FAVOR

A continuación encontrará una serie de cuestiones referidas a **cómo se siente respecto a su trabajo** con las que podrá estar de acuerdo o no. Por favor, indique lo que piensa en relación con cada una de ellas, marcando con un círculo el número que mejor describa su opinión, **en los últimos 30 días**, según la siguiente escala de respuesta:

- 1 = totalmente en desacuerdo
- 2 = en desacuerdo
- 3 = de acuerdo
- 4 = totalmente de acuerdo

Por favor, lea atentamente todas las cuestiones. Asegúrese de contestar todas según lo que piense en ese momento.

Recuerde que este cuestionario es totalmente anónimo, los datos tendrán un tratamiento únicamente estadístico.

1. En nuestro servicio, la presión temporal por acudir al aviso es muy alta.

1-----2-----3-----4  
 Totalmente En desacuerdo De acuerdo Totalmente  
 en desacuerdo de acuerdo

2. En nuestro servicio, la presión por atender inicialmente a un paciente recién ingresado es muy alta.

1-----2-----3-----4  
 Totalmente En desacuerdo De acuerdo Totalmente  
 en desacuerdo de acuerdo

3. Cuando el familiar o el paciente también son sanitarios, resulta incómodo realizar mi trabajo.

1-----2-----3-----4  
 Totalmente En desacuerdo De acuerdo Totalmente  
 en desacuerdo de acuerdo

4. Me cuesta olvidar situaciones donde la víctima es un menor o un anciano.

1-----2-----3-----4  
 Totalmente En desacuerdo De acuerdo Totalmente  
 en desacuerdo de acuerdo

5. Siento que me afectan mucho los casos que de alguna manera se asemejan a mi vida.

1-----2-----3-----4  
 Totalmente En desacuerdo De acuerdo Totalmente  
 en desacuerdo de acuerdo

6. La satisfacción que me reporta mi trabajo me da energías para continuar trabajando en él.

1-----2-----3-----4  
 Totalmente En desacuerdo De acuerdo Totalmente  
 en desacuerdo de acuerdo

7. Me supera emocionalmente este trabajo.

1-----2-----3-----4  
 Totalmente En desacuerdo De acuerdo Totalmente  
 en desacuerdo de acuerdo

8. Me siento emocionalmente sin fuerzas.

1-----2-----3-----4  
 Totalmente En desacuerdo De acuerdo Totalmente  
 en desacuerdo de acuerdo

9. No tengo ganas de ir a trabajar

1-----2-----3-----4  
 Totalmente En desacuerdo De acuerdo Totalmente  
 en desacuerdo de acuerdo

10. Me he llegado a cuestionar mis propias creencias después de algunas intervenciones.

1-----2-----3-----4  
 Totalmente En desacuerdo De acuerdo Totalmente  
 en desacuerdo de acuerdo

11. Mi trabajo me ha hecho ver que el mundo es injusto.

1-----2-----3-----4  
 Totalmente En desacuerdo De acuerdo Totalmente  
 en desacuerdo de acuerdo

12. Si algo he aprendido en mi trabajo como profesional de intensivos, es que las cosas no suceden como deberían.

1-----2-----3-----4  
Totalmente En desacuerdo De acuerdo Totalmente  
en desacuerdo de acuerdo

13. Guardo imágenes muy reales de aquellos pacientes que más me afectaron.

1-----2-----3-----4  
Totalmente En desacuerdo De acuerdo Totalmente  
en desacuerdo de acuerdo

14. Recuerdo hasta el nombre de algunos pacientes

1-----2-----3-----4  
Totalmente En desacuerdo De acuerdo Totalmente  
en desacuerdo de acuerdo

15. A veces pienso en aquellos pacientes que han fallecido mientras los atendía.

1-----2-----3-----4  
Totalmente En desacuerdo De acuerdo Totalmente  
en desacuerdo de acuerdo

16. Siento que mis pacientes “me contagian” sus sentimientos.

1-----2-----3-----4  
Totalmente En desacuerdo De acuerdo Totalmente  
en desacuerdo de acuerdo

17. Con determinados pacientes me implico emocionalmente demasiado.

1-----2-----3-----4  
Totalmente En desacuerdo De acuerdo Totalmente  
en desacuerdo de acuerdo

18. Cuando termina una intervención creo sentir como propia la misma angustia que sentía mi paciente.

1-----2-----3-----4  
Totalmente En desacuerdo De acuerdo Totalmente  
en desacuerdo de acuerdo

19. Tengo problemas cardíacos o cardiovasculares.

1-----2-----3-----4  
Totalmente En desacuerdo De acuerdo Totalmente  
en desacuerdo de acuerdo

20. Mi trabajo me lleva a discutir frecuentemente con mi familia.

1-----2-----3-----4  
 Totalmente En desacuerdo De acuerdo Totalmente  
 en desacuerdo de acuerdo

21. A veces pongo alguna excusa (estoy enfermo, se me ha muerto un familiar...) para no ir a trabajar.

1-----2-----3-----4  
 Totalmente En desacuerdo De acuerdo Totalmente  
 en desacuerdo de acuerdo

Las siguientes preguntas se refieren a cómo se siente respecto a su trabajo. Por favor, lea cuidadosamente cada pregunta y decida el grado de acuerdo con cada afirmación, en una escala de 1 a 7, siendo 1 “totalmente en desacuerdo” y 7 “totalmente de acuerdo”.

22. Mi trabajo me permite vivir todo tipo de experiencias

1-----2-----3-----4-----5-----6-----7  
 Totalmente en Neutral Totalmente de  
 desacuerdo acuerdo

23. Mi trabajo refleja las cualidades que me gustan de mi

1-----2-----3-----4-----5-----6-----7  
 Totalmente en Neutral Totalmente de  
 desacuerdo acuerdo

24. Mi trabajo está en armonía con las otras actividades de mi vida.

1-----2-----3-----4-----5-----6-----7  
 Totalmente en Neutral Totalmente de  
 desacuerdo acuerdo

25. Dependo emocionalmente de mi trabajo.

1-----2-----3-----4-----5-----6-----7  
 Totalmente en Neutral Totalmente de  
 desacuerdo acuerdo

26. Me cuesta controlar la necesidad de trabajar.

1-----2-----3-----4-----5-----6-----7  
 Totalmente en Neutral Totalmente de  
 desacuerdo acuerdo

27. Tengo un sentimiento casi obsesivo respecto a mi trabajo.

1-----2-----3-----4-----5-----6-----7  
 Totalmente en Neutral Totalmente de  
 desacuerdo acuerdo

Nos gustaría que respondieras a algunas preguntas relacionadas con tu vida emocional, en particular cómo controlas o cómo manejas y regulas tus emociones. En este sentido, estamos interesados en dos aspectos principales: por un lado tu experiencia emocional, o cómo sientes las emociones; y por otro la expresión emocional o como muestras tus emociones en tu forma de hablar o de comportarte. Aunque algunas de las siguientes preguntas pudieran parecer similares, difieren en aspectos bastante importantes.

Para cada uno de los ítems utiliza la siguiente escala de respuesta:

1-----2-----3-----4-----5-----6-----7  
 Totalmente en Neutral Totalmente de  
 desacuerdo acuerdo

28.\_\_\_\_ Trato de mantener ocultos mis sentimientos.

29.\_\_\_\_ Cuando quiero sentir menos una emoción negativa (por ejemplo, tristeza o enfado), modifico lo que pienso sobre ello.

30.\_\_\_\_ Controlo mis emociones no expresándolas

31.\_\_\_\_ Cuando estoy sintiendo emociones negativas, me aseguro de no expresarlas.

32.\_\_\_\_ Controlo mis emociones cambiando la manera de pensar sobre la situación en la que me encuentro.

33.\_\_\_\_ Cuando quiero sentir más una emoción positiva, cambio la manera de pensar sobre esa situación.

**CUMPLIR CON LAS REGLAS DE EXPRESIÓN DE EMOCIONES EN EL TRABAJO** se refiere al proceso por el cual expresas las emociones que tu puesto requiere. (Ej. Sonriendo cuando te encuentras con los clientes, ocultando tu enfado cuando tienes que tratar con pacientes malhumorados o desagradables etc.)

En el último mes, ¿**CADA CUÁNTO** has sentido que...

34. ... este trabajo requiere un gran esfuerzo emocional?

1-----2-----3-----4-----5  
 nunca siempre

35. ... que el esfuerzo que inviertes en cumplir con las reglas de expresión de emociones de tu puesto es mayor que la tarea en sí que tienes que realizar?

1-----2-----3-----4-----5  
nunca siempre

36. ...que cometes más errores en otras tareas debido a ese esfuerzo?

1-----2-----3-----4-----5  
nunca siempre

Para finalizar, nos gustaría que respondieras a las siguientes preguntas sobre cómo te relacionas contigo mismo, qué piensas sobre ti, cómo te sientes al respecto y cómo actúas. Para cada uno de los ítems utiliza la siguiente escala de respuesta:

1-----2-----3-----4-----5  
casi nunca casi siempre

37. Cuando veo los aspectos de mí mismo que no me gustan, me siento decepcionado

1-----2-----3-----4-----5  
casi nunca casi siempre

38. Trato de ver mis defectos, como parte normal de la condición humana.

1-----2-----3-----4-----5  
casi nunca casi siempre

39. Cuando fallo en algo que es importante para mí, intento ver las cosas con perspectiva

1-----2-----3-----4-----5  
casi nunca casi siempre
